# Supplementary material for: Anti-PD-1 Autoantibody Predicts Survival of Patients With Hepatocellular Carcinoma Receiving Atezolizumab/Bevacizumab
Source: PubMed Central journal article supplement (PMC11570718; doi:10.1016/j.gastha.2024.07.018), 2024-08-02
Supplement: mmc1.pdf [file mmc1.pdf]

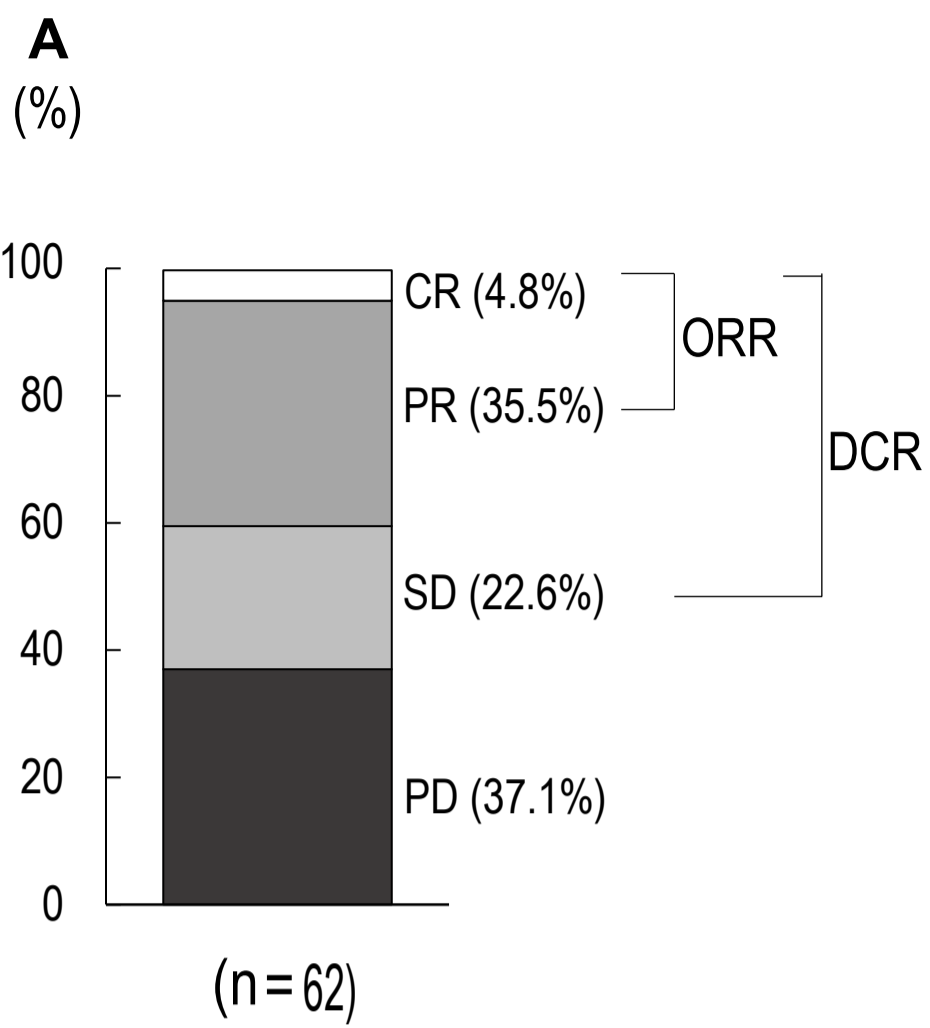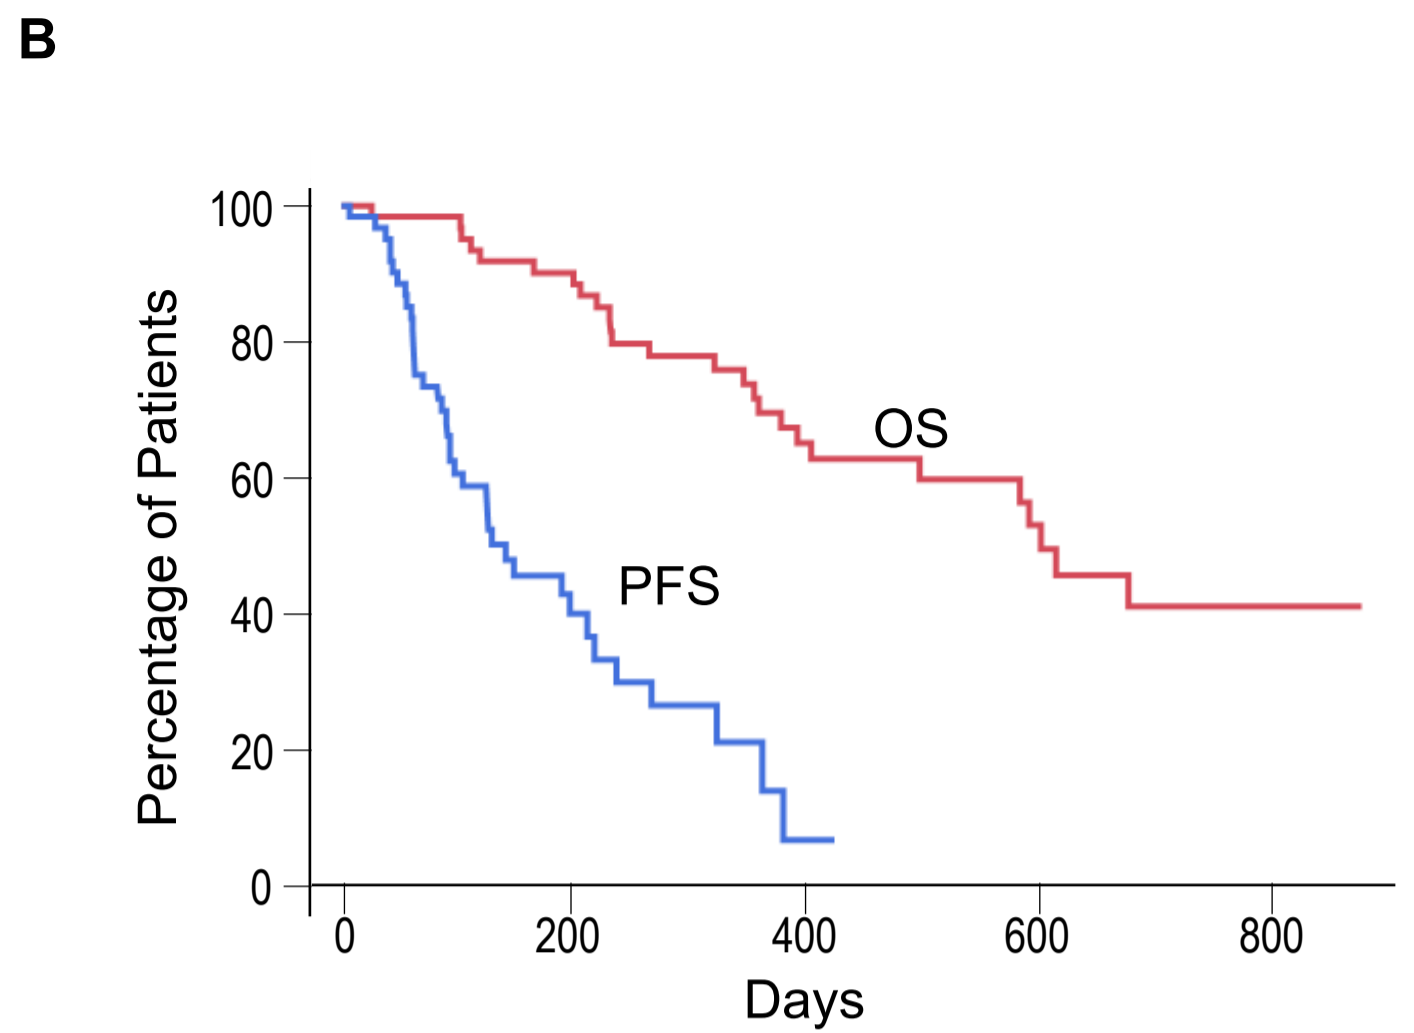

No. at risk

|     |    |    |    |    |    |    |    |    |
|-----|----|----|----|----|----|----|----|----|
| PFS | 63 | 39 | 30 | 26 | 23 |    |    |    |
| OS  | 63 | 62 | 56 | 50 | 44 | 42 | 39 | 37 |

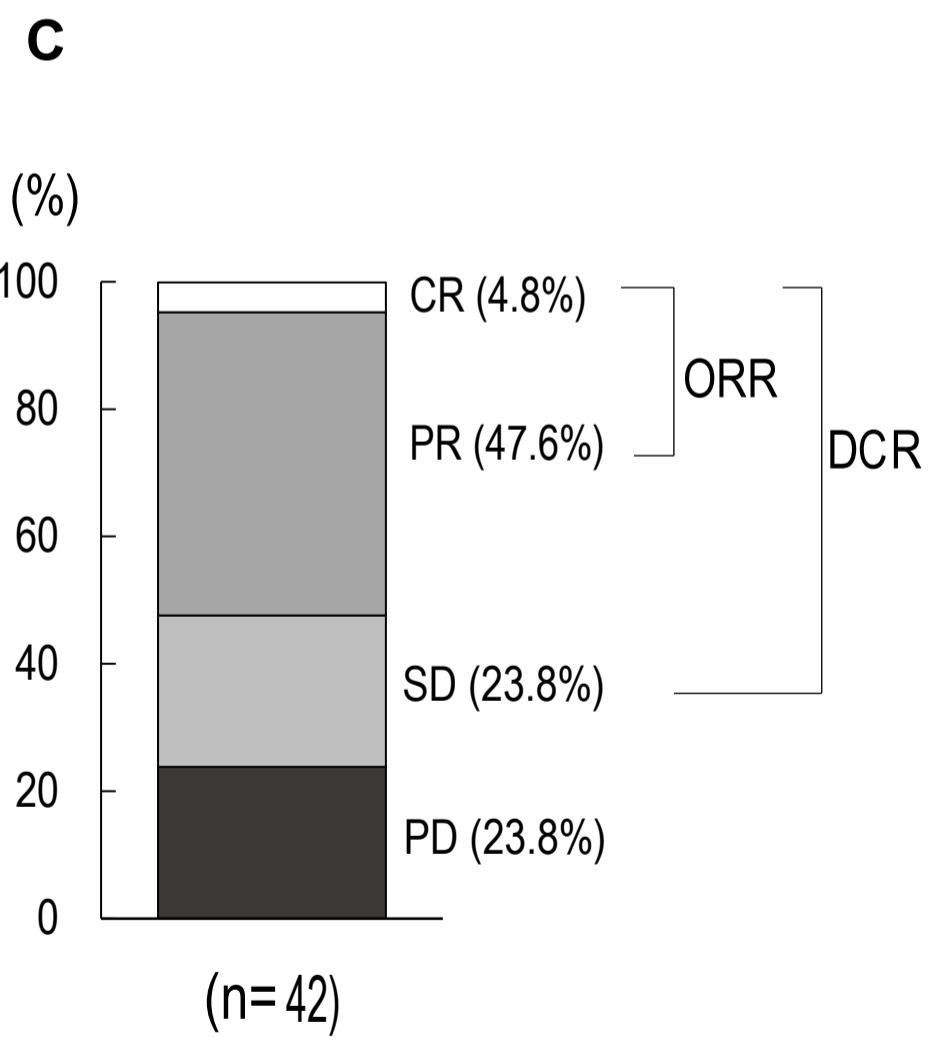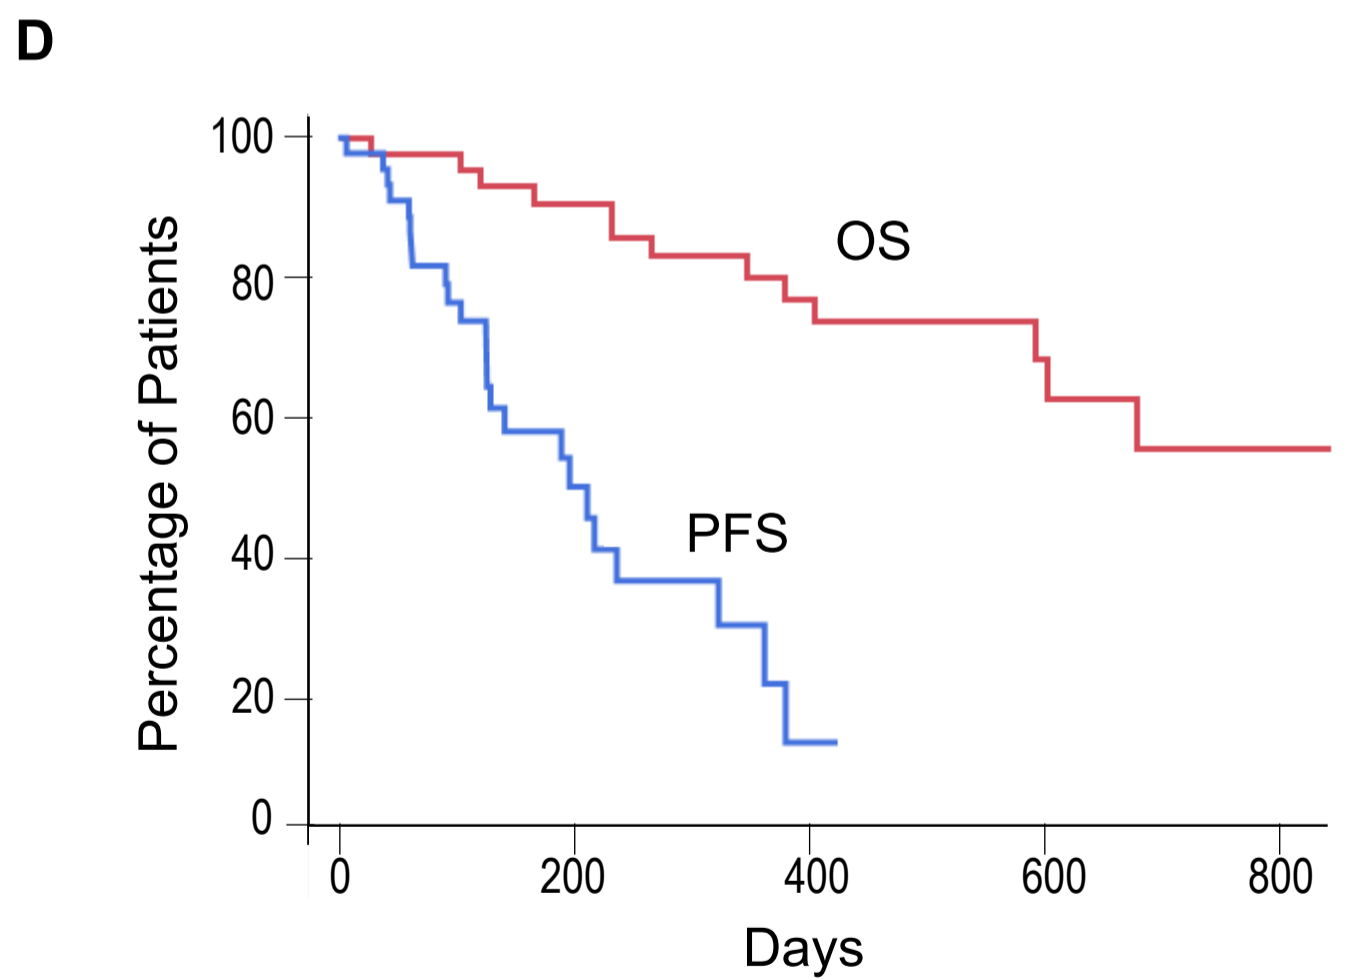

No. at risk

|     |    |    |    |    |    |    |    |    |
|-----|----|----|----|----|----|----|----|----|
| PFS | 43 | 33 | 25 | 22 | 19 |    |    |    |
| OS  | 43 | 42 | 39 | 36 | 34 | 33 | 32 | 30 |
