# Supplementary material for: Anti-PD-1 Autoantibody Predicts Survival of Patients With Hepatocellular Carcinoma Receiving Atezolizumab/Bevacizumab
Source: PubMed Central journal article supplement (PMC11570718; doi:10.1016/j.gastha.2024.07.018), 2024-08-02

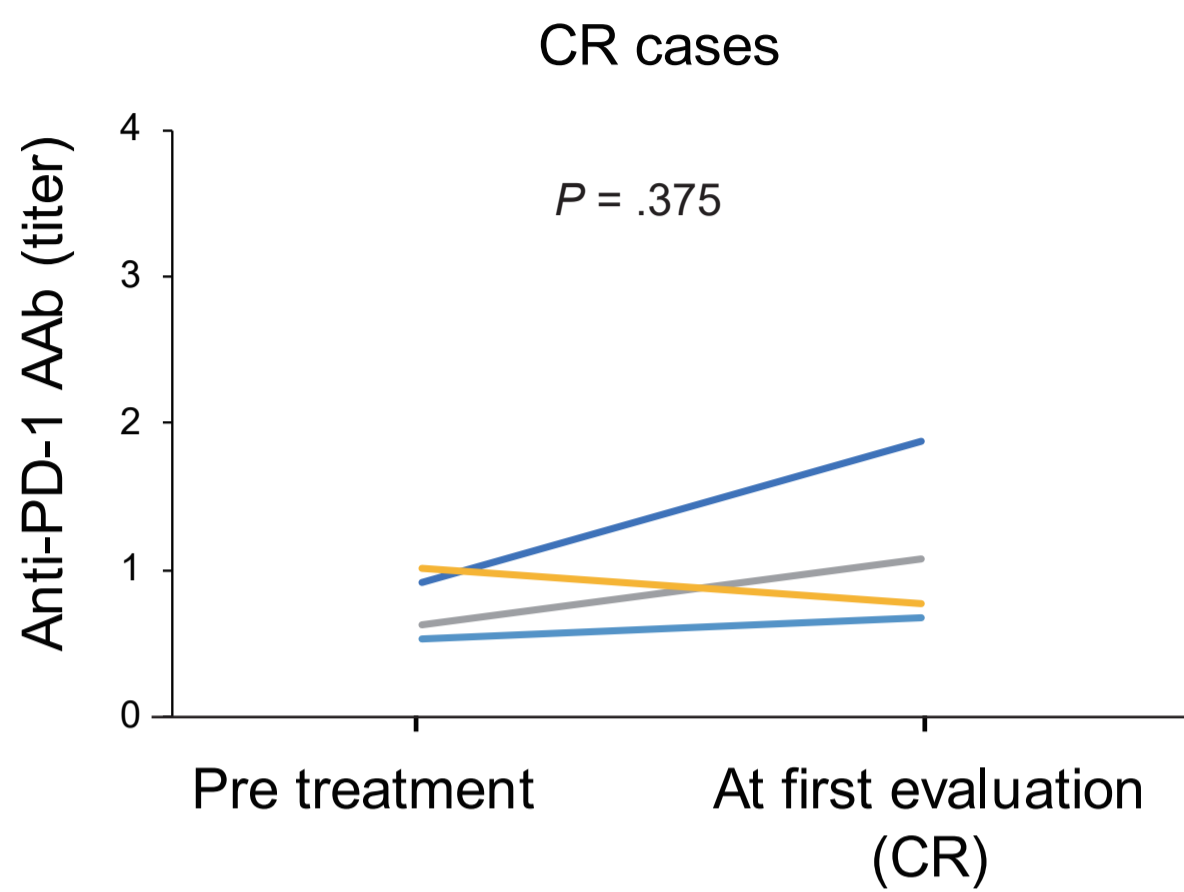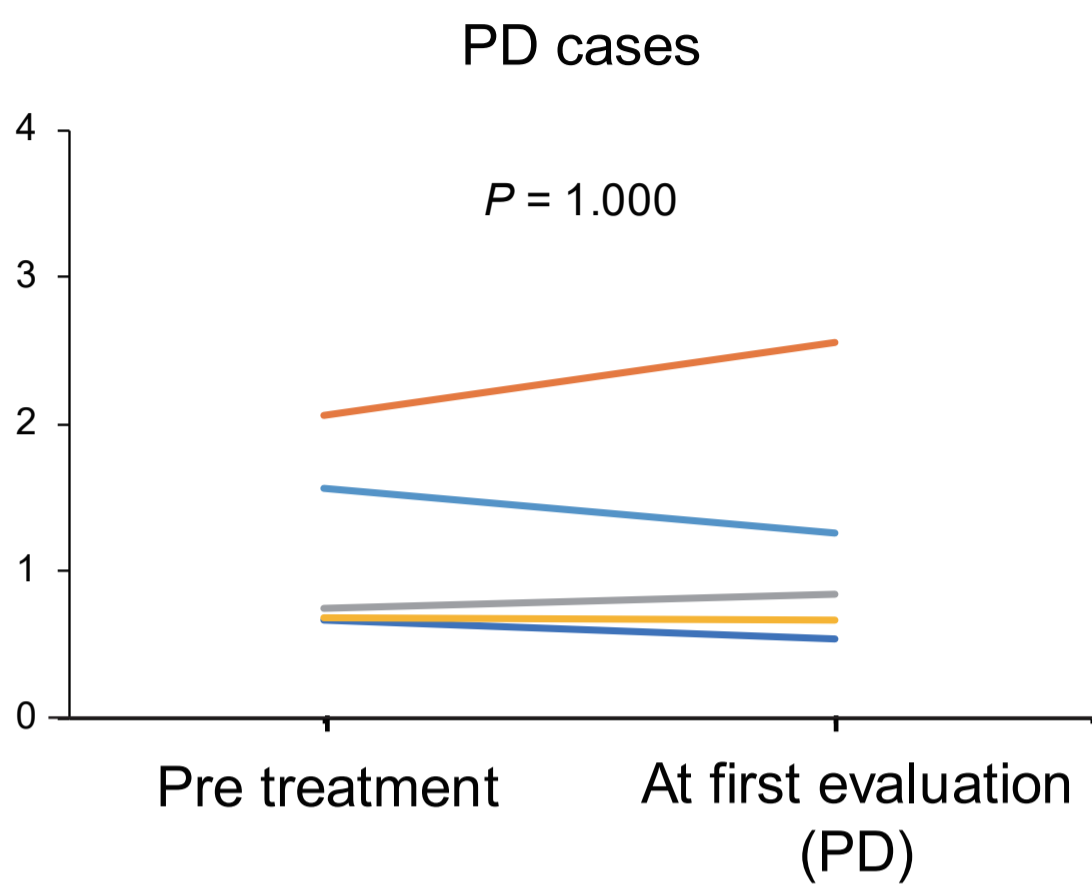

Supplement: mmc2.pdf [file mmc2.pdf]
